# Supplementary material
Source: PubMed Central journal article supplement (PMC3775372)
Supplement: DS_10.1177_0022034513500306.pdf [file DS_10.1177_0022034513500306.pdf]

B.F. Boyce

University of Rochester Medical Center, 601 Elmwood Avenue, Box 626,  
Rochester, NY 14642, USA; Brendan\_Boyce@urmc.rochester.edu

*J Dent Res* DOI: 10.1177/0022034513500306

# Advances in the Regulation of Osteoclasts and Osteoclast Functions

## APPENDIX

**Appendix Table 1.** Osteoblast Interactions

| Osteoblast-expressed | Effects on Osteoclasts                       |
|----------------------|----------------------------------------------|
| M-CSF                | Enhances formation, activation, and survival |
| RANKL                | Enhances formation, activation, and survival |
| OPG                  | Inhibits formation, activation, and survival |
| Wnt5a                | Enhances formation                           |
| Jagged 1             | Inhibits formation by increasing OPG         |
| Semaphorin 6d        | Enhances formation                           |
| Eph4                 | Inhibits formation                           |
| Zfp521               | Inhibits formation                           |
| Ebf-1                | Promotes formation                           |

**Appendix Table 2.** Osteoclast Interactions

| Osteoclast-expressed | Effects on Osteoblasts              |
|----------------------|-------------------------------------|
| Cathepsin K          | Inhibits RANKL expression           |
| Semaphorin 4D        | Inhibits osteoblast differentiation |
| Ephrin B2            | Promotes osteoblast differentiation |
